# Supplementary material for: BiOCl/TiO2/diatomite composites with enhanced visible-light photocatalytic activity for the degradation of rhodamine B
Source: publisher site journal article supplement (doi:10.3762/bjnano.10.139), 2019-07-16
Supplement: Additional file 1 [file 2190-4286-10-139-S1.pdf]

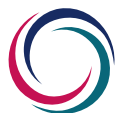

## Supporting Information

for

### **BiOCl/TiO<sub>2</sub>/diatomite composites with enhanced visible-light photocatalytic activity for the degradation of rhodamine B**

Minlin Ao, Kun Liu, Xuekun Tang, Zishun Li, Qian Peng and Jing Huang

*Beilstein J. Nanotechnol.* **2019**, *10*, 1412–1422. doi:10.3762/bjnano.10.139

## Additional figures

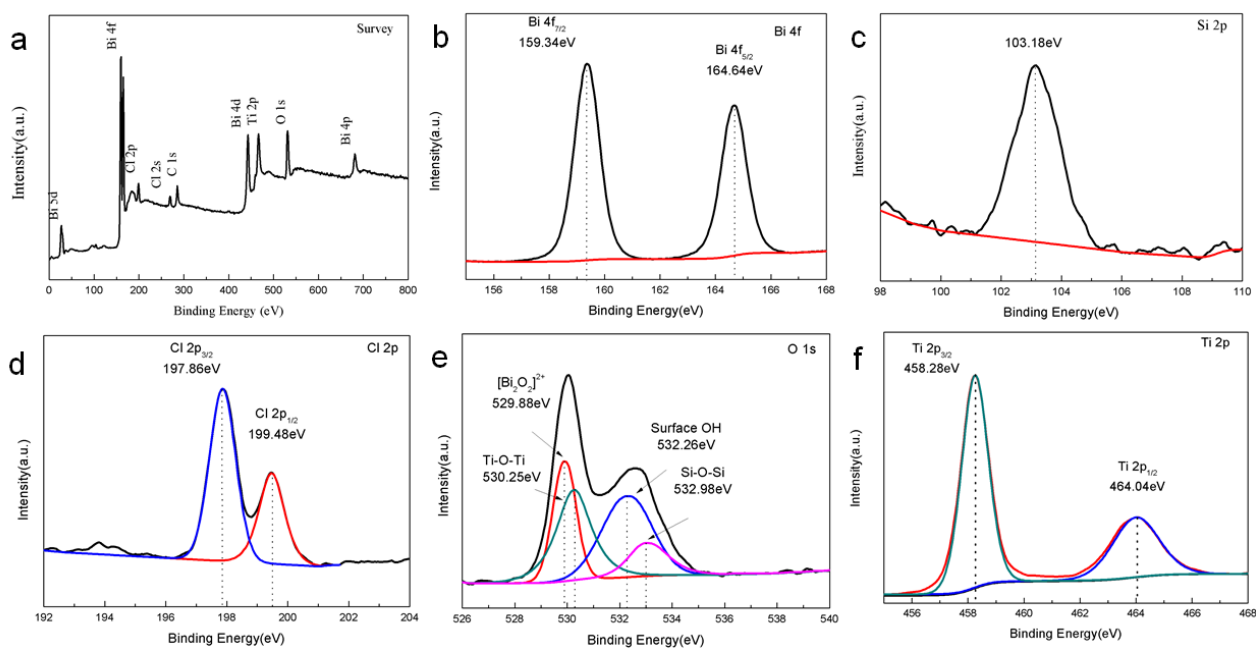

**Figure S1:** XPS spectra of recovered BTD, including survey scan (a), Bi 4f (b), Si 2p (c), Cl 2p (d), O 1s (e) and Ti 2p (f).

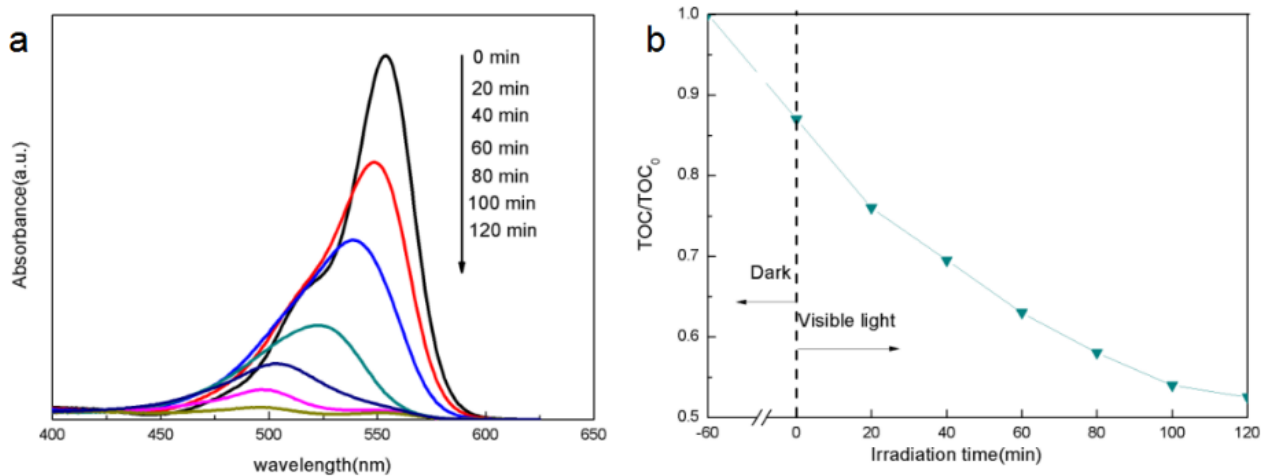

**Figure S2:** UV-vis spectra (a) and change chart of TOC (b) of RhB solution during photodegradation process.

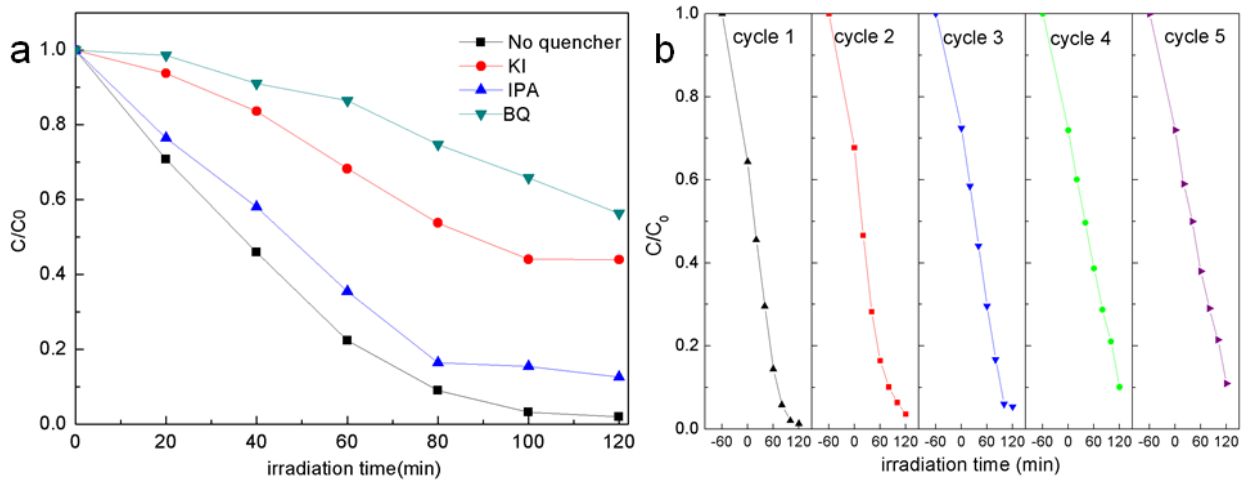

**Figure S3:** Free radical capture experiments (a) and cycling tests (b) for the photodegradation of RhB with BTB.
